# Supplementary material
Source: PubMed Central journal article supplement (PMC4248869)
Supplement: JB.02034-14_zjb999093373so1.pdf [file JB.02034-14_zjb999093373so1.pdf]

**SUPPLEMENTAL MATERIAL**

**TABLE S1. Primers used in this study**

| Primer (gene)                                                    | 5' to 3' sequence <sup>a</sup>                                                   |
|------------------------------------------------------------------|----------------------------------------------------------------------------------|
| <b>Primers used for constructing RpoE overexpression vectors</b> |                                                                                  |
| P1 ( <i>rpoE</i> F)                                              | ATATATCATATGATGGGTGACCAAATAACCGATCAAG                                            |
| P2 ( <i>rpoE</i> R1)                                             | ATATATGGATCCCTAACTCTGTTGCATCAGTGGATTG                                            |
| P3 ( <i>rpoE-FLAG</i> F)                                         | TCGCACTAGAAATAATTTTGTAACTTTAAGAAGGAGATATACATATGGACTACAAAG<br>ACCATGACGGTGATT     |
| P4 ( <i>rpoE-FLAG</i> R)                                         | TCACCTTGCTGTGCACGCTCAACCAATACTTGATCGGTTATTTGGTCACCCTTGTCATCGT<br>CATCCTTGTAAATCG |
| P5 ( <i>FLAG</i> F)                                              | ATGGACTACAAAGACCATGACGGTG                                                        |
| P6 ( <i>rpoE</i> R2)                                             | TAAATATTAACCTCTGTTGCATCAGTGGATTG                                                 |
| <b>Primers used for RT-PCR</b>                                   |                                                                                  |
| P7 ( <i>rpoE-rseA</i> F)                                         | CATATCGAATTCGGGCGCAACTTCGAGAAAGTGATA                                             |
| P8 ( <i>rpoE-rseA</i> R)                                         | CATATCGGATCCGCAATGCCCGCTTGTATGATAGGA                                             |
| P9 ( <i>rseA-rseC</i> F)                                         | TAGCTAACTAGTCGATGGGTGCGAAGTTGATGATGT                                             |
| P10 ( <i>rseA-rseC</i> R)                                        | CATATCGGATCCCCCTGCGACCAACGGCATATTTACT                                            |
| P11 ( <i>rseC-fadD</i> F)                                        | AGCTATCCATGGATGATGGTTGAAACAGCAAC                                                 |
| P12 ( <i>rseC-fadD</i> R)                                        | TAGCTAACTAGTCTTCAATAACGGCTCAGCAACCCA                                             |
| <b>Primers used for qRT-PCR</b>                                  |                                                                                  |
| P13 ( <i>HD0518</i> RT F)                                        | GGCTGAATTGACCGCTTTTATC                                                           |
| P14 ( <i>HD0518</i> RT R)                                        | CAGGGTCTGGGTTGTTTACT                                                             |
| P15 ( <i>rhuA</i> RT F)                                          | CGGGCAATCGACCAGAATA                                                              |
| P16 ( <i>rhuA</i> RT R)                                          | CCGCTCGTTGCCATATCTAA                                                             |
| P17 ( <i>dsbA</i> RT F)                                          | TAGCGGCTGATGCTGTTGAAGGAA                                                         |
| P18 ( <i>dsbA</i> RT R)                                          | GGCAACGCTTGCTTAATTTGTGCTGG                                                       |
| P19 ( <i>degP</i> RT F)                                          | TGCGTTATCGGATGTTGCGCTAGT                                                         |
| P20 ( <i>degP</i> RT R)                                          | ATACCAGATGTCACCGTTTGCCCT                                                         |
| P21 ( <i>HD0192</i> RT F)                                        | GTAACAGACACTGCAGCAAAC                                                            |
| P22 ( <i>HD0192</i> RT R)                                        | CAGCCGATTCTTCATGTCTTC                                                            |
| <b>Primers used for generating the reporter constructs</b>       |                                                                                  |
| P23 ( <i>dsbA</i> rep F)                                         | ATATATAGATCTGGTTTTTAAAGGAACTAAAAGGTG                                             |
| P24 ( <i>dsbA</i> rep R)                                         | ATATATAGATCTTAGTGTTCCCTTAAAATAATTAGTG                                            |
| P25 ( <i>degP</i> rep F)                                         | GGCCATAGATCTCACGCAAATTAAGGTTTTTCATAAA                                            |
| P26 ( <i>degP</i> rep R)                                         | GGCCATAGATCTGACTTTATTCATTCGTATCATCCT                                             |
| P27 ( <i>hfq</i> rep F)                                          | ATATATAGATCTGAGGTCGAAAAGTTATACGCGA                                               |
| P28 ( <i>hfq</i> rep R)                                          | AGATATAGATCTTCTCTTTTCTTTTTATTTTGTTT                                              |
| P29 ( <i>rpoE</i> rep F)                                         | ATATATAGATCTCCGCTTAATTTTGAAAAATTCGAG                                             |
| P30 ( <i>rpoE</i> rep R)                                         | ATATATAGATCTTTTATTTGCGTTCTCCTACTCAAT                                             |
| P31 ( <i>rpoH</i> rep F)                                         | ATATATAGATCTGCGCGAAGGCTAAATGCAGGTTAT                                             |
| P32 ( <i>rpoH</i> rep R)                                         | AGATATAGATCTGCTCTTTCTCGTGAGTTCTTTGA                                              |
| P33 ( <i>p15A</i> F)                                             | CTACCAGCGGTGGTTTTTCAAATATGTATCCGCTCATGAG                                         |
| P34 ( <i>p15A</i> R)                                             | GACCGGAGGCTTTTGGCGCTAGCGGAGTGATAC                                                |
| P35 ( <i>pT</i> F)                                               | CAAAGCCTCCGGTCCGA                                                                |
| P36 ( <i>pT</i> R)                                               | AAACCACCGCTGGTAGCG                                                               |
| <b>Primers used for site directed mutagenesis</b>                |                                                                                  |
| P37 ( <i>rpoH</i> mut F1)                                        | GGGATTAGCGAAGTCCAAAAAGCACGTCGAGGTGCGGTA                                          |
| P38 ( <i>rpoH</i> mut R1)                                        | TACCGCACCTCGACGTGCTTTTGGACTTCGCTAATCCC                                           |
| P39 ( <i>rpoH</i> mut F2)                                        | CCACTTTGACAGCTAATAAAAAAACCAAAAACCGTGCAATTTACAAATACCGTTTACAG                      |
| P40 ( <i>rpoH</i> mut R2)                                        | CTGTAAACGGTATTTGTAAATTGCACGGTTTTTGGTTTTTTTATTAGCTGTCAAAGTGG                      |

Underlining indicates regions corresponding to restriction enzyme sites as mentioned in the text. *H. ducreyi* sequences are from GenBank accession no. AE017143. Primers used for qRT-PCR analysis of *dnaE*, *HD0430*, *HD0930*, *fimA*, *hfq*, and *ompP2B* have been described previously (11).

8

TABLE S2. Summary of RNA-Seq read statistics.

| Bacterial strain | Time (minutes) | Biological replicate | Total reads | Aligned reads | % aligned reads | Average coverage/nt | Intergenic reads | % intergenic reads |
|------------------|----------------|----------------------|-------------|---------------|-----------------|---------------------|------------------|--------------------|
| 35000HP-(pDG10)  | 0              | R1                   | 13,589,450  | 12,736,961    | 93.7            | 7.5                 | 2,357,729        | 18.5               |
|                  |                | R2                   | 14,596,082  | 13,545,067    | 92.8            | 8.0                 | 2,424,639        | 17.9               |
|                  |                | R3                   | 14,420,320  | 13,340,948    | 92.5            | 7.9                 | 1,962,803        | 14.7               |
|                  |                | R4                   | 19,580,696  | 17,757,964    | 90.7            | 10.5                | 2,551,870        | 14.4               |
|                  | 5              | R1                   | 14,131,185  | 13,214,407    | 93.5            | 7.8                 | 2,180,469        | 16.5               |
|                  |                | R2                   | 13,415,750  | 12,437,051    | 92.7            | 7.3                 | 1,993,433        | 16.0               |
|                  |                | R3                   | 14,505,393  | 13,425,485    | 92.6            | 7.9                 | 1,577,955        | 11.8               |
|                  |                | R4                   | 14,191,670  | 12,976,132    | 91.4            | 7.6                 | 1,995,425        | 15.4               |
|                  | 10             | R1                   | 13,984,110  | 13,157,018    | 94.1            | 7.7                 | 2,001,501        | 15.2               |
|                  |                | R2                   | 12,397,169  | 11,561,606    | 93.3            | 6.8                 | 2,062,093        | 17.8               |
|                  |                | R3                   | 14,663,147  | 13,621,679    | 92.9            | 8.0                 | 1,428,346        | 10.5               |
|                  |                | R4                   | 14,095,207  | 12,906,685    | 91.6            | 7.6                 | 1,896,426        | 14.7               |
| 35000HP-(pDG9)   | 0              | R1                   | 16,414,348  | 15,657,482    | 95.4            | 9.2                 | 2,905,343        | 18.6               |
|                  |                | R2                   | 13,254,910  | 12,618,611    | 95.2            | 7.4                 | 2,363,239        | 18.7               |
|                  |                | R3                   | 13,654,380  | 13,074,424    | 95.8            | 7.7                 | 1,440,740        | 11.0               |
|                  |                | R4                   | 11,194,376  | 10,733,401    | 95.9            | 6.3                 | 1,709,079        | 15.9               |
|                  | 5              | R1                   | 12,025,896  | 11,562,282    | 96.1            | 6.8                 | 1,518,910        | 13.1               |
|                  |                | R2                   | 12,994,803  | 12,470,595    | 96.0            | 7.3                 | 1,991,359        | 16.0               |
|                  |                | R3                   | 13,319,602  | 12,812,443    | 96.2            | 7.5                 | 1,683,514        | 13.1               |
|                  |                | R4                   | 11,262,696  | 10,815,640    | 96.0            | 6.4                 | 1,086,657        | 10.0               |
|                  | 10             | R1                   | 12,226,178  | 11,793,624    | 96.5            | 6.9                 | 1,501,448        | 12.7               |
|                  |                | R2                   | 14,346,417  | 13,817,520    | 96.3            | 8.1                 | 2,092,132        | 15.1               |
|                  |                | R3                   | 13,923,212  | 13,459,211    | 96.7            | 7.9                 | 1,157,958        | 8.6                |
|                  |                | R4                   | 10,305,741  | 9,956,442     | 96.6            | 5.9                 | 913,060          | 9.2                |

9

10

11

12

13

14

15

16

17

18

19

20

21  
22

TABLE S3. ORFs annotated as encoding hypothetical proteins differentially expressed by overexpression of RpoE in *H. ducreyi*.

| ORF                     | Description | 5 minutes <sup>a</sup> |          | 10 minutes <sup>b</sup> |          |
|-------------------------|-------------|------------------------|----------|-------------------------|----------|
|                         |             | Fold change            | P value  | Fold change             | P value  |
| <b>UPREGULATED ORFs</b> |             |                        |          |                         |          |
| HD0035                  |             | 2.5                    | 5.0E-29  | 4.1                     | 1.7E-73  |
| HD0055                  |             | 3.7                    | 1.9E-45  | 5.4                     | 1.3E-83  |
| HD0065                  |             |                        |          | 3.0                     | 1.5E-49  |
| HD0087                  |             | 6.3                    | 6.6E-35  | 8.6                     | 9.0E-58  |
| HD0095                  |             |                        |          | 2.1                     | 8.3E-03  |
| HD0096                  |             |                        |          | 2.7                     | 2.0E-05  |
| HD0097                  |             |                        |          | 2.5                     | 7.1E-09  |
| HD0098                  |             | 2.2                    | 1.3E-03  | 2.6                     | 9.9E-08  |
| HD0099                  |             |                        |          | 3.1                     | 1.4E-02  |
| HD0102                  |             |                        |          | 2.1                     | 4.5E-07  |
| HD0107                  |             |                        |          | 2.4                     | 3.9E-05  |
| HD0108                  |             |                        |          | 2.3                     | 2.4E-09  |
| HD0109                  |             |                        |          | 2.5                     | 3.3E-07  |
| HD0110                  |             |                        |          | 2.8                     | 1.4E-11  |
| HD0111                  |             | 2.0                    | 3.9E-05  | 3.5                     | 2.0E-22  |
| HD0112                  |             | 2.4                    | 1.1E-04  | 2.7                     | 1.2E-06  |
| HD0118                  |             | 3.6                    | 1.3E-04  | 5.6                     | 2.1E-12  |
| HD0119                  |             | 2.3                    | 2.9E-06  | 4.1                     | 1.0E-18  |
| HD0120                  |             |                        |          | 2.0                     | 3.6E-07  |
| HD0121                  |             |                        |          | 2.7                     | 5.3E-14  |
| HD0123                  |             |                        |          | 3.1                     | 9.0E-34  |
| HD0124                  |             |                        |          | 2.4                     | 2.2E-22  |
| HD0132                  |             |                        |          | 3.3                     | 1.3E-27  |
| HD0133                  |             | 2.5                    | 4.0E-09  | 4.7                     | 7.2E-32  |
| HD0134                  |             | 2.2                    | 1.8E-11  | 4.7                     | 2.0E-47  |
| HD0135                  |             | 2.3                    | 8.7E-12  | 5.7                     | 8.7E-52  |
| HD0136                  |             | 2.7                    | 8.1E-18  | 6.6                     | 1.0E-68  |
| HD0137                  |             | 3.3                    | 3.3E-15  | 6.9                     | 3.7E-48  |
| HD0138                  |             | 2.1                    | 5.6E-08  | 5.2                     | 7.9E-27  |
| HD0140                  |             |                        |          | 3.3                     | 3.0E-37  |
| HD0141                  |             |                        |          | 2.1                     | 1.2E-14  |
| HD0142                  |             |                        |          | 3.6                     | 3.4E-15  |
| HD0143                  |             | 2.2                    | 1.2E-02  | 3.6                     | 2.6E-09  |
| HD0145                  |             |                        |          | 2.4                     | 5.0E-17  |
| HD0146                  |             | 2.1                    | 1.3E-15  | 3.7                     | 1.2E-51  |
| HD0147                  |             | 2.7                    | 6.2E-17  | 4.8                     | 2.6E-48  |
| HD0148                  |             | 3.4                    | 9.9E-51  | 6.9                     | 1.2E-132 |
| HD0149                  |             |                        |          | 4.0                     | 3.5E-14  |
| HD0150                  |             |                        |          | 2.3                     | 1.4E-17  |
| HD0153                  |             |                        |          | 3.7                     | 4.6E-16  |
| HD0192                  |             | 10.6                   | 1.1E-157 | 18.7                    | 4.8E-290 |
| HD0222                  |             |                        |          | 2.3                     | 1.6E-24  |
| HD0236                  |             |                        |          | 2.6                     | 1.5E-09  |
| HD0254                  |             | 3.0                    | 9.6E-42  | 4.6                     | 1.2E-95  |
| HD0255                  |             | 3.9                    | 1.5E-64  | 6.7                     | 6.6E-146 |
| HD0256                  |             | 5.4                    | 1.1E-101 | 10.3                    | 9.7E-219 |
| HD0257                  |             | 5.5                    | 1.4E-103 | 9.8                     | 6.2E-211 |
| HD0261                  |             | 3.7                    | 4.6E-53  | 5.6                     | 4.5E-115 |
| HD0267                  |             | 2.0                    | 2.6E-15  | 2.5                     | 4.3E-31  |
| HD0280                  |             | 2.4                    | 1.4E-09  | 3.3                     | 2.8E-26  |
| HD0285                  |             | 2.1                    | 6.1E-19  | 3.3                     | 2.3E-59  |
| HD0286                  |             | 2.0                    | 1.2E-15  | 3.3                     | 3.5E-53  |
| HD0425                  |             |                        |          | 2.3                     | 3.2E-30  |
| HD0429                  |             |                        |          | 2.7                     | 5.1E-04  |
| HD0430                  |             | 2.6                    | 5.8E-04  | 3.1                     | 1.2E-07  |
| HD0431                  |             | 3.8                    | 2.9E-08  | 5.2                     | 7.2E-17  |

| ORF    | Description | 5 minutes <sup>a</sup> |          | 10 minutes <sup>b</sup> |          |
|--------|-------------|------------------------|----------|-------------------------|----------|
|        |             | Fold change            | P value  | Fold change             | P value  |
| HD0432 |             | 2.1                    | 3.4E-07  | 2.5                     | 8.1E-15  |
| HD0470 |             | 4.2                    | 1.2E-64  | 5.7                     | 1.2E-119 |
| HD0478 |             | 3.7                    | 2.0E-42  | 4.6                     | 8.5E-73  |
| HD0489 |             |                        |          | 2.6                     | 6.2E-13  |
| HD0495 |             | 3.9                    | 8.9E-13  | 5.9                     | 4.6E-30  |
| HD0496 |             | 3.4                    | 1.2E-23  | 5.4                     | 3.1E-53  |
| HD0497 |             | 2.0                    | 3.8E-08  | 3.6                     | 6.0E-30  |
| HD0501 |             |                        |          | 2.6                     | 2.9E-32  |
| HD0502 |             |                        |          | 2.0                     | 1.2E-03  |
| HD0503 |             |                        |          | 3.4                     | 4.7E-05  |
| HD0504 |             |                        |          | 2.7                     | 3.6E-16  |
| HD0506 |             |                        |          | 4.3                     | 6.6E-10  |
| HD0507 |             |                        |          | 2.7                     | 9.6E-12  |
| HD0509 |             | 2.0                    | 3.3E-07  | 3.3                     | 8.1E-24  |
| HD0514 |             |                        |          | 2.9                     | 1.3E-32  |
| HD0518 |             | 6.1                    | 6.3E-83  | 10.5                    | 8.8E-162 |
| HD0519 |             | 2.8                    | 1.6E-18  | 4.3                     | 3.6E-45  |
| HD0520 |             |                        |          | 3.3                     | 1.3E-21  |
| HD0521 |             |                        |          | 3.3                     | 2.2E-21  |
| HD0522 |             |                        |          | 2.7                     | 9.1E-24  |
| HD0523 |             |                        |          | 2.9                     | 2.1E-34  |
| HD0527 |             |                        |          | 3.0                     | 2.6E-36  |
| HD0529 |             |                        |          | 2.9                     | 1.6E-27  |
| HD0530 |             |                        |          | 3.0                     | 1.5E-29  |
| HD0531 |             | 2.1                    | 4.1E-11  | 3.9                     | 6.0E-45  |
| HD0532 |             |                        |          | 2.7                     | 3.2E-28  |
| HD0538 |             |                        |          | 2.1                     | 7.3E-18  |
| HD0552 |             | 3.1                    | 2.1E-43  | 4.8                     | 5.2E-99  |
| HD0553 |             | 2.6                    | 1.9E-34  | 3.7                     | 3.5E-77  |
| HD0584 |             | 2.3                    | 1.3E-20  | 3.4                     | 1.7E-55  |
| HD0586 |             | 2.7                    | 3.1E-30  | 3.8                     | 1.5E-69  |
| HD0587 |             | 2.7                    | 1.5E-33  | 3.7                     | 2.4E-71  |
| HD0627 |             |                        |          | 2.1                     | 4.2E-12  |
| HD0664 |             | 6.5                    | 4.2E-74  | 11.3                    | 6.0E-148 |
| HD0665 |             | 8.4                    | 6.3E-131 | 17.5                    | 1.1E-274 |
| HD0680 |             | 7.4                    | 3.9E-116 | 12.3                    | 6.7E-221 |
| HD0681 |             | 5.0                    | 1.1E-84  | 8.2                     | 5.4E-171 |
| HD0694 |             |                        |          | 2.9                     | 3.1E-36  |
| HD0697 |             | 3.7                    | 1.5E-59  | 5.8                     | 1.1E-126 |
| HD0698 |             | 4.2                    | 2.0E-74  | 6.6                     | 8.3E-151 |
| HD0713 |             |                        |          | 2.3                     | 3.8E-27  |
| HD0720 |             | 7.6                    | 2.7E-36  | 10.0                    | 5.2E-61  |
| HD0746 |             |                        |          | 2.2                     | 2.9E-34  |
| HD0754 |             | 2.4                    | 1.4E-13  | 4.1                     | 2.4E-54  |
| HD0756 |             | 2.6                    | 5.3E-35  | 4.8                     | 7.2E-103 |
| HD0757 |             | 4.3                    | 2.9E-71  | 7.7                     | 3.1E-162 |
| HD0799 |             | 4.5                    | 2.2E-76  | 6.4                     | 4.3E-140 |
| HD0800 |             |                        |          | 2.0                     | 4.8E-19  |
| HD0884 |             | 3.2                    | 1.3E-41  | 5.8                     | 2.7E-115 |
| HD0899 |             |                        |          | 2.5                     | 6.1E-20  |
| HD0918 |             | 5.1                    | 1.0E-78  | 7.7                     | 1.1E-144 |
| HD0919 |             | 3.5                    | 9.1E-44  | 6.5                     | 1.5E-105 |
| HD0920 |             | 2.6                    | 8.5E-19  | 4.5                     | 1.0E-50  |
| HD0921 |             | 2.5                    | 2.9E-23  | 5.5                     | 6.9E-81  |
| HD0922 |             | 2.6                    | 9.3E-35  | 5.4                     | 1.7E-108 |
| HD0927 |             | 3.1                    | 1.4E-17  | 6.3                     | 1.8E-55  |
| HD0928 |             | 3.4                    | 1.6E-42  | 6.9                     | 1.1E-114 |
| HD0930 |             | 6.0                    | 6.6E-72  | 9.1                     | 1.9E-129 |
| HD0931 |             | 6.4                    | 2.3E-97  | 11.5                    | 2.8E-186 |
| HD0932 |             | 6.0                    | 4.8E-75  | 12.2                    | 3.1E-162 |

| ORF    | Description | 5 minutes <sup>a</sup> |          | 10 minutes <sup>b</sup> |          |
|--------|-------------|------------------------|----------|-------------------------|----------|
|        |             | Fold change            | P value  | Fold change             | P value  |
| HD0933 |             | 4.4                    | 8.8E-77  | 8.5                     | 1.3E-182 |
| HD0937 |             | 3.5                    | 4.5E-19  | 4.5                     | 3.4E-37  |
| HD0938 |             | 3.2                    | 1.3E-30  | 7.1                     | 1.5E-93  |
| HD0939 |             | 5.4                    | 2.9E-58  | 9.5                     | 1.1E-121 |
| HD0940 |             | 2.4                    | 1.0E-15  | 4.7                     | 4.1E-50  |
| HD0941 |             |                        |          | 2.9                     | 1.8E-34  |
| HD0947 |             |                        |          | 2.6                     | 1.4E-32  |
| HD0959 |             |                        |          | 2.1                     | 2.7E-05  |
| HD0960 |             | 2.0                    | 2.6E-08  | 3.0                     | 2.6E-23  |
| HD0961 |             |                        |          | 2.4                     | 1.0E-23  |
| HD0965 |             |                        |          | 2.3                     | 2.6E-07  |
| HD1011 |             |                        |          | 2.4                     | 3.6E-32  |
| HD1031 |             | 7.0                    | 9.1E-121 | 12.7                    | 9.3E-239 |
| HD1060 |             | 9.5                    | 2.2E-170 |                         |          |
| HD1090 |             | 3.0                    | 4.1E-05  | 3.1                     | 6.8E-07  |
| HD1126 |             |                        |          | 2.1                     | 3.3E-10  |
| HD1136 |             |                        |          | 3.0                     | 3.0E-50  |
| HD1137 |             | 2.3                    | 1.6E-26  | 3.5                     | 2.7E-66  |
| HD1138 |             | 2.4                    | 3.6E-28  | 3.7                     | 3.4E-74  |
| HD1190 |             |                        |          | 2.6                     | 4.4E-40  |
| HD1216 |             | 2.3                    | 1.0E-24  | 3.0                     | 3.1E-52  |
| HD1218 |             | 13.5                   | 2.4E-195 |                         |          |
| HD1239 |             | 3.0                    | 1.1E-45  | 5.3                     | 7.5E-120 |
| HD1339 |             | 3.5                    | 6.6E-63  | 5.1                     | 3.0E-124 |
| HD1343 |             | 2.6                    | 1.8E-39  | 4.7                     | 2.0E-106 |
| HD1400 |             | 6.9                    | 2.0E-128 | 11.9                    | 9.3E-244 |
| HD1408 |             | 3.1                    | 3.3E-48  | 4.1                     | 3.6E-90  |
| HD1409 |             | 3.7                    | 3.7E-54  | 5.4                     | 1.6E-111 |
| HD1410 |             | 2.9                    | 1.1E-35  | 4.0                     | 1.1E-74  |
| HD1413 |             |                        |          | 2.4                     | 6.9E-32  |
| HD1437 |             |                        |          | 2.3                     | 6.4E-14  |
| HD1444 |             | 2.2                    | 2.0E-10  | 2.6                     | 1.6E-20  |
| HD1452 |             | 2.1                    | 2.4E-09  | 2.5                     | 6.4E-21  |
| HD1471 |             | 2.1                    | 2.5E-20  | 2.6                     | 3.3E-41  |
| HD1517 |             |                        |          | 2.5                     | 2.8E-04  |
| HD1528 |             |                        |          | 2.2                     | 6.7E-18  |
| HD1530 |             |                        |          | 2.2                     | 2.2E-13  |
| HD1532 |             |                        |          | 2.0                     | 8.9E-14  |
| HD1533 |             |                        |          | 2.4                     | 5.6E-12  |
| HD1534 |             | 2.4                    | 8.3E-06  | 2.7                     | 1.5E-08  |
| HD1548 |             | 2.9                    | 2.7E-14  | 3.7                     | 9.7E-27  |
| HD1549 |             | 2.3                    | 4.5E-14  | 3.5                     | 2.0E-36  |
| HD1550 |             |                        |          | 2.4                     | 3.2E-16  |
| HD1552 |             | 2.0                    | 2.5E-07  | 2.5                     | 7.8E-14  |
| HD1553 |             |                        |          | 2.4                     | 3.1E-14  |
| HD1554 |             |                        |          | 2.8                     | 5.4E-25  |
| HD1555 |             | 2.3                    | 5.4E-18  | 3.7                     | 1.1E-51  |
| HD1556 |             |                        |          | 3.4                     | 1.7E-41  |
| HD1557 |             | 2.6                    | 1.3E-29  | 4.7                     | 3.4E-85  |
| HD1558 |             | 2.4                    | 1.3E-14  | 3.8                     | 1.0E-39  |
| HD1559 |             |                        |          | 2.4                     | 6.0E-22  |
| HD1560 |             |                        |          | 2.5                     | 1.0E-16  |
| HD1561 |             |                        |          | 2.6                     | 2.1E-29  |
| HD1562 |             |                        |          | 2.5                     | 1.4E-21  |
| HD1563 |             |                        |          | 2.6                     | 4.0E-19  |
| HD1564 |             |                        |          | 2.8                     | 1.2E-19  |
| HD1565 |             |                        |          | 2.8                     | 2.7E-37  |
| HD1567 |             |                        |          | 2.1                     | 2.7E-08  |
| HD1569 |             |                        |          | 3.0                     | 8.0E-36  |
| HD1571 |             |                        |          | 2.5                     | 6.5E-25  |

| ORF                       | Description | 5 minutes <sup>a</sup> |         | 10 minutes <sup>b</sup> |          |
|---------------------------|-------------|------------------------|---------|-------------------------|----------|
|                           |             | Fold change            | P value | Fold change             | P value  |
| <i>HD1572</i>             |             |                        |         | 2.5                     | 2.6E-27  |
| <i>HD1573</i>             |             |                        |         | 3.3                     | 2.0E-37  |
| <i>HD1574</i>             |             |                        |         | 2.5                     | 2.9E-24  |
| <i>HD1694</i>             |             |                        |         | 2.0                     | 2.8E-06  |
| <i>HD1714</i>             |             |                        |         | 2.5                     | 7.3E-24  |
| <i>HD1730</i>             |             |                        |         | 3.2                     | 4.7E-04  |
| <i>HD1749</i>             |             |                        |         | 2.2                     | 1.1E-28  |
| <i>HD1769</i>             |             | 3.0                    | 1.6E-46 | 4.4                     | 6.2E-97  |
| <i>HD1770</i>             |             | 2.0                    | 1.2E-20 | 2.5                     | 4.9E-41  |
| <i>HD1820</i>             |             | 2.5                    | 2.8E-23 | 3.8                     | 3.6E-62  |
| <i>HD1821</i>             |             | 2.4                    | 2.0E-19 | 3.6                     | 1.8E-52  |
| <i>HD1825</i>             |             |                        |         | 2.7                     | 4.7E-32  |
| <i>HD1827</i>             |             | 2.2                    | 4.2E-21 | 3.1                     | 5.4E-54  |
| <i>HD1828</i>             |             | 3.3                    | 4.2E-46 | 4.8                     | 1.4E-97  |
| <i>HD1829</i>             |             | 4.6                    | 1.2E-76 | 7.2                     | 1.4E-152 |
| <i>HD1904</i>             |             |                        |         | 2.1                     | 2.9E-06  |
| <i>HD1916</i>             |             |                        |         | 2.3                     | 3.2E-30  |
| <i>HD1936</i>             |             | 2.8                    | 7.1E-27 | 4.5                     | 2.4E-75  |
| <i>HD1937</i>             |             | 2.2                    | 5.2E-17 | 3.5                     | 7.5E-56  |
| <i>HD1989</i>             |             |                        |         | 2.2                     | 6.5E-04  |
| <i>HD2011</i>             |             |                        |         | 2.2                     | 1.2E-19  |
| <i>HD2014</i>             |             | 3.0                    | 1.7E-29 | 4.4                     | 1.1E-70  |
| <i>HD2015</i>             |             | 2.2                    | 8.3E-30 | 3.1                     | 5.4E-67  |
| <i>HD2017</i>             |             |                        |         | 2.1                     | 2.8E-34  |
| <b>DOWNREGULATED ORFs</b> |             |                        |         |                         |          |
| <i>HD1434</i>             |             | -2.4                   | 3.1E-23 | -3.1                    | 2.9E-46  |

23 <sup>a</sup>Mean fold change in expression in 35000HP(pDG9) compared to 35000HP(pDG10) at 5 minutes after induction of RpoE; the fold change was  
24 normalized by dividing the fold change at 5 minutes with that of 0 minutes.

25 <sup>b</sup>Mean fold change in expression in 35000HP(pDG9) compared to 35000HP(pDG10) at 10 minutes after induction of RpoE; the fold change was  
26 normalized by dividing the fold change at 10 minutes with that of 0 minutes.

27

28

29

30

31

32

33

34

35

36

37 TABLE S4. TSSs predicted based on the RNA-Seq data.

| Gene <sup>a</sup> | TSS <sup>b</sup> |
|-------------------|------------------|
| <i>ampD</i>       | 1471939          |
| <i>apt</i>        | 1523764          |
| <i>asnC</i>       | 1608803          |
| <i>cysZ</i>       | 662685           |
| <i>dacA</i>       | *                |
| <i>degP</i>       | 196542           |
| <i>glmM</i>       | *                |
| <i>HD0035</i>     | 31995            |
| <i>HD0055</i>     | 49635            |
| <i>HD0112</i>     | *                |
| <i>HD0119</i>     | *                |
| <i>HD0133</i>     | *                |
| <i>HD0192</i>     | 137210           |
| <i>HD0267</i>     | *                |
| <i>HD0285</i>     | *                |
| <i>HD0286</i>     | 220667           |
| <i>HD0470</i>     | 370043           |
| <i>HD0478</i>     | *                |
| <i>HD0518</i>     | *                |
| <i>HD0531</i>     | *                |
| <i>HD0553</i>     | 425006           |
| <i>HD0665</i>     | 527663           |
| <i>HD0681</i>     | *                |
| <i>HD0720</i>     | *                |
| <i>HD0799</i>     | 634226           |
| <i>HD0918</i>     | *                |
| <i>HD0919</i>     | 734893           |
| <i>HD0920</i>     | 735284           |
| <i>HD0921</i>     | *                |
| <i>HD0939</i>     | *                |
| <i>HD0940</i>     | *                |
| <i>HD0947</i>     | *                |
| <i>HD0961</i>     | *                |
| <i>HD1060</i>     | 843443           |
| <i>HD1218</i>     | 988319           |
| <i>HD1239</i>     | 1007377          |
| <i>HD1339</i>     | *                |
| <i>HD1400</i>     | 1146714          |
| <i>HD1408</i>     | *                |
| <i>HD1409</i>     | 1153213          |
| <i>HD1410</i>     | 1153873          |
| <i>HD1471</i>     | *                |
| <i>HD1534</i>     | *                |
| <i>HD1548</i>     | *                |
| <i>HD1552</i>     | *                |
| <i>HD1558</i>     | *                |
| <i>HD1770</i>     | *                |
| <i>HD1829</i>     | 1533088          |
| <i>HD2015</i>     | 1678014          |
| <i>lsgA</i>       | 704913           |
| <i>lysA</i>       | *                |

| Gene <sup>a</sup> | TSS <sup>b</sup> |
|-------------------|------------------|
| <i>mazG</i>       | 1203420          |
| <i>mdh</i>        | *                |
| <i>mogA</i>       | 52322            |
| <i>murA</i>       | *                |
| <i>mutT</i>       | 1496726          |
| <i>nlpD</i>       | *                |
| <i>oapA</i>       | 514734           |
| <i>oapB</i>       | 516147           |
| <i>prc</i>        | 802045           |
| <i>proQ</i>       | 801373           |
| <i>rpoE</i>       | 952467           |
| <i>rpoH</i>       | 71151            |
| <i>rseC</i>       | 953992           |
| <i>rsuA</i>       | *                |
| <i>sbcB</i>       | 1156700          |
| <i>smpA</i>       | 985518           |
| <i>surA</i>       | 958955           |
| <i>surE</i>       | 597140           |
| <i>upp</i>        | 956224           |
| <i>uppS</i>       | 975038           |
| <i>uvrD</i>       | *                |
| <i>waaF</i>       | *                |
| <i>hfq</i>        | 583087           |
| <i>dsbA</i>       | 501598           |
| <i>lspB</i>       | 921940           |

38 <sup>a</sup>Gene or the first gene in the operon; operon structures predicted by the DOOR database were used.

39 <sup>b</sup>Coordinates of the TSS predicted using the RNA-Seq data.

40 \*Genes for which TSSs were unclear.

41

42

43

44

45

46

47

48

49

50

51

52

53



TABLE S5. Putative RpoE promoters in the upstream regions of RpoE-dependent TUs.

| Gene                     | Putative RpoE promoter <sup>a</sup>                   | Spacer <sup>b</sup> | Position <sup>c</sup> | Score <sup>d</sup> | Position of additional putative promoters <sup>e</sup> |
|--------------------------|-------------------------------------------------------|---------------------|-----------------------|--------------------|--------------------------------------------------------|
| HD0035 <sup>f</sup>      | <b>TAAACTATAAA</b> GTAAATAAAT <b>CAAA</b>             | 12                  | -135, -116            | 3.3, 3.8           |                                                        |
| HD0055                   | <b>GCATCATT</b> AGCTTGGAA <b>GGCTAA</b>               | 11                  | -348, -330            | 3.4, 2.9           |                                                        |
| HD0112 <sup>f</sup>      | <b>TGCAC</b> TATTTTTACC <b>CCATCACCAAA</b>            | 14                  | -30, -9               | 2.7, 3.3           |                                                        |
| HD0119 <sup>f</sup>      | <b>GCATTTTT</b> TATTCCTTTTT <b>TATTCAAA</b>           | 14                  | 35, 56                | 3.3, 3.8           |                                                        |
| HD0133 <sup>f</sup>      | <b>TAATCG</b> TGGCGATTATCTGTAAAT <b>TCAAA</b>         | 19                  | -97, -71              | 2.5, 3.8           |                                                        |
| HD0192 <sup>f</sup>      | <b>TGAACCC</b> CGCTACCGAACAG <b>CAACCAAA</b>          | 15                  | -448, -426            | 2.7, 3.3           |                                                        |
| HD0267 <sup>f</sup>      | <b>TCAACCAT</b> ATCACTTACATCAAG <b>TTACTTAA</b>       | 20                  | -317, -290            | 3.2, 3.7           |                                                        |
| HD0280 <sup>f</sup>      | <b>GGATG</b> TTTACATTTAGTTTT <b>TGAACCATCTAA</b>      | 19                  | -432, -406            | 2.8, 3.7           |                                                        |
| HD0285                   | <b>TGATC</b> CTGTGTATATTTGGAG <b>TGCTAA</b>           | 15                  | 35, 57                | 3.7, 2.9           |                                                        |
| HD0286 <sup>f</sup>      | <b>TAAAT</b> TTTGGTGAAT <b>TGAGCCAAA</b>              | 13                  | -415, -395            | 2.9, 3.3           |                                                        |
| HD0470 <sup>f</sup>      | <b>TGAAC</b> TTAGCAAAGTCCAT <b>TGGTCAAA</b>           | 16                  | -85, -62              | 4.8, 3.8           | 40, 61; 40, 66                                         |
| HD0478 <sup>f</sup>      | <b>TAAAC</b> TTTGACGCATTT <b>CCCCCAAA</b>             | 14                  | -281, -260            | 4.1, 3.3           | -419, -400; -35, -12                                   |
| HD0518 <sup>f</sup>      | <b>TCAAC</b> TGCATTTTACAAAA <b>TCCCTCAAA</b>          | 17                  | -102, -78             | 4.0, 3.8           | -96, -78; -38, -17                                     |
| HD0531                   | <b>CCACC</b> CTGATGCCTT <b>ACTCGTCTAT</b>             | 13                  | -297, -277            | 2.1, 3.0           |                                                        |
| HD0553                   | <b>TGATC</b> TTGATAAACCC <b>CCACAATCAAG</b>           | 15                  | -403, -381            | 4.3, 2.6           |                                                        |
| HD0665 <sup>f</sup>      | <b>TGAAC</b> TTATCTACAT <b>TGCAAGATTCTAA</b>          | 16                  | -132, -109            | 4.8, 3.7           |                                                        |
| HD0681 <sup>f</sup>      | <b>TGAAC</b> TAATAAA <b>CAAA</b> TATAT <b>TCTCTAA</b> | 16                  | -36, -13              | 4.0, 3.7           |                                                        |
| HD0720 <sup>f</sup>      | <b>TCATC</b> TTCAAAAAGCG <b>CGCAGAAGTCTTAA</b>        | 20                  | -382, -355            | 4.1, 3.7           | -277, -260                                             |
| HD0754                   | <b>CGATC</b> CGTTATTTGG <b>CGATCCGACCATA</b>          | 16                  | -183, -160            | 2.9, 2.6           |                                                        |
| HD0799 <sup>f</sup>      | <b>TCAAT</b> TACCTGACAC <b>ATTGCCAAA</b>              | 13                  | -394, -374            | 2.6, 3.3           | -322, -296                                             |
| HD0918                   | <b>GCATC</b> TTCAAATATGG <b>AACAATCATT</b>            | 15                  | -404, -382            | 4.5, 2.4           |                                                        |
| HD0919 <sup>f</sup>      | <b>CGAAT</b> TGGCTGATTAG <b>ACCGAGTGCTAAA</b>         | 17                  | -419, -395            | 2.8, 3.8           |                                                        |
| HD0920                   | <b>TCATC</b> TTGAAC <b>TGGCCATCAGCTAT</b>             | 14                  | -154, -133            | 3.5, 2.1           |                                                        |
| HD0921 <sup>f</sup>      | <b>GAAAC</b> GGATGTGG <b>CAAGCCAAA</b>                | 12                  | -331, -312            | 2.9, 3.3           |                                                        |
| HD0939 <sup>f</sup>      | <b>GAAAC</b> TAAGGAGC <b>ATAATGCCAAA</b>              | 15                  | -278, -256            | 3.7, 3.3           | 13, 35                                                 |
| HD0940 <sup>f</sup>      | <b>CTATC</b> TTTACGATAG <b>CCTTTCTTTCAAA</b>          | 18                  | -123, -98             | 2.7, 3.8           |                                                        |
| HD0960 <sup>f</sup>      | <b>CCAAC</b> AGCGCAG <b>ATCTATGCAATCAAA</b>           | 16                  | -410, -387            | 2.7, 3.8           |                                                        |
| HD1060 <sup>f</sup>      | <b>TGAAC</b> AAACAA <b>ACAAAAAATCAAA</b>              | 13                  | 75, 95                | 2.9, 3.8           |                                                        |
| HD1218 <sup>f</sup>      | <b>TCAAC</b> TCGCAGAA <b>ATACTTCAAAA</b>              | 14                  | -370, -349            | 3.1, 3.8           |                                                        |
| HD1239 <sup>f</sup>      | <b>GCAT</b> TACCCCA <b>AAAAATCACCACTTCTAA</b>         | 20                  | -156, -129            | 2.7, 3.7           | -95, -78                                               |
| HD1339 <sup>f</sup>      | <b>TGAAT</b> TTTTTTAG <b>AGAAATGCTTGCTAAA</b>         | 16                  | -51, -28              | 3.6, 3.8           | -50, -28                                               |
| HD1400                   | <b>GAAAC</b> TTTCAGGCG <b>TTTTTTCTGCCTAA</b>          | 16                  | -63, -40              | 4.5, 3.1           |                                                        |
| HD1408 <sup>f</sup>      | <b>TGAAC</b> TACCCACTAT <b>TGTGGCTTGCTAAA</b>         | 17                  | 39, 63                | 4.0, 3.8           | -270, -245                                             |
| HD1409 <sup>f</sup>      | <b>TGAAC</b> TACCCACTAT <b>TGTGGCTTGCTAAA</b>         | 17                  | -114, -90             | 4.0, 3.8           | -441, -423; -422, -397                                 |
| HD1410 <sup>f</sup>      | <b>TGAAT</b> TTAAAAGC <b>ATTGGCGTCAAAA</b>            | 14                  | -245, -224            | 3.6, 3.8           | -3, 18; -124, -106                                     |
| HD1444                   | <b>GAAAC</b> TAAGATTAT <b>TTTTTATCTTTT</b>            | 14                  | -38, -17              | 3.7, 2.2           |                                                        |
| HD1452                   | <b>GAAAC</b> TAAGATTAT <b>TTTTTATCTTTT</b>            | 14                  | -26, -5               | 3.7, 2.2           |                                                        |
| HD1471 <sup>f</sup>      | <b>AGAAC</b> TAGAACAG <b>ATTATTAATCAAAA</b>           | 14                  | 18, 39                | 3.4, 3.8           |                                                        |
| HD1534 <sup>f</sup>      | <b>GAAAC</b> AAAGTCAA <b>ATTATCAAAA</b>               | 10                  | -344, -327            | 2.6, 3.8           | -357, -335                                             |
| HD1548                   | <b>TGTAC</b> TGCTAA <b>ATACCCCTCTAA</b>               | 11                  | -446, -428            | 2.1, 3.7           |                                                        |
| HD1552                   | <b>CAAAC</b> TGCCAA <b>ACTGGAATGTGAGATTGCTAA</b>      | 20                  | -423, -396            | 3.3, 2.9           |                                                        |
| HD1558                   | <b>CAAAC</b> TTTAGCTA <b>ATCCAAAAGCTAT</b>            | 14                  | 64, 85                | 3.9, 2.1           |                                                        |
| HD1770 <sup>f</sup>      | <b>TCAAT</b> TAGCTATTCAA <b>ATTTACCCATTCAAA</b>       | 19                  | -37, -11              | 2.6, 3.8           |                                                        |
| HD1829                   | <b>GGAAC</b> GTTTTAA <b>ACAATCAGCACAAGCTAT</b>        | 18                  | -182, -157            | 4.1, 2.1           |                                                        |
| HD2015 <sup>f</sup>      | <b>TGAT</b> TTTGTGCA <b>ACTTTTGTCAAAA</b>             | 12                  | -58, -39              | 3.1, 3.8           |                                                        |
| <i>ampD</i> <sup>f</sup> | <b>TCAAAT</b> TTAAT <b>TGACTAATCTTAA</b>              | 12                  | -61, -42              | 2.7, 3.7           | -60, -42                                               |
| <i>apt</i> <sup>f</sup>  | <b>GCAAC</b> AA <b>CATTTAATCATCAAAA</b>               | 10                  | -277, -260            | 3.1, 3.8           | -28, -6; -283, -260                                    |
| <i>asnC</i>              | <b>TGATC</b> TGATAA <b>AGTTCAGTTAATTTGCAAAA</b>       | 18                  | -252, -227            | 3.7, 3.0           |                                                        |
| <i>comA</i>              | <b>GGATC</b> TACGC <b>CTTTGTGTTCATA</b>               | 11                  | -428, -410            | 3.9, 3.1           |                                                        |
| <i>cysZ</i> <sup>f</sup> | <b>GGAT</b> TTTGTCCAT <b>ATTGGAGTGGATCTAA</b>         | 17                  | -309, -285            | 3.5, 3.7           |                                                        |
| <i>dacA</i>              | <b>TCAAT</b> TTAATGG <b>TCGTTAACCCTAA</b>             | 15                  | -396, -374            | 3.4, 2.9           |                                                        |
| <i>degP</i>              | <b>TCAAT</b> TTTATCT <b>TCATTAGTCTTA</b>              | 12                  | 10, 29                | 3.4, 3.0           |                                                        |
| <i>glmM</i>              | <b>TAAAC</b> TTAATA <b>TAATTTGCAAT</b>                | 10                  | -53, -36              | 4.1, 2.3           |                                                        |
| <i>lsgA</i> <sup>f</sup> | <b>GCAAT</b> ATTA <b>AAAGCGGTAAAAACCAAA</b>           | 15                  | -190, -168            | 2.7, 3.3           |                                                        |
| <i>mazG</i>              | <b>TGAAT</b> TTA <b>ATAACACAGTAGCAAAA</b>             | 12                  | 15, 34                | 3.6, 3.0           |                                                        |
| <i>mdh</i> <sup>f</sup>  | <b>GCAT</b> TTTTAA <b>AGCTTCTGACAAGCGGTCTAA</b>       | 19                  | -229, -203            | 3.3, 3.7           | -139, -121; -144, -121; -143, -121                     |
| <i>mogA</i>              | <b>GCAAC</b> GTA <b>ACCCAAACAATGCAAAA</b>             | 12                  | -432, -413            | 3.9, 3.0           |                                                        |
| <i>murA</i> <sup>f</sup> | <b>GAAAT</b> TTTACG <b>TAAATGCCCTACCAAA</b>           | 14                  | -342, -321            | 3.3, 3.3           |                                                        |
| <i>mutT</i>              | <b>GAAAC</b> TTTTT <b>GTGTAATTTACTGGCCCTTA</b>        | 16                  | -86, -63              | 4.5, 2.4           |                                                        |
| <i>nlpD</i> <sup>f</sup> | <b>AGAAT</b> TTTTA <b>AGGATAATACTTCAAAA</b>           | 14                  | -27, -6               | 3.0, 3.8           | -26, -6                                                |
| <i>oapA</i>              | <b>CAATC</b> TFACT <b>CTTGCTTCATCAAAA</b>             | 12                  | 39, 58                | 3.4, 3.8           | 38, 58                                                 |
| <i>oapB</i> <sup>f</sup> | <b>ACATC</b> TGTAA <b>AAACGGATAATATATCTTCTAA</b>      | 20                  | -387, -360            | 3.0, 3.7           |                                                        |
| <i>prc</i>               | <b>GCAAC</b> GTA <b>AAAGAACAGCGAAAAGACTTCTTT</b>      | 19                  | -239, -213            | 3.9, 2.2           |                                                        |
| <i>proQ</i>              | <b>GAAAC</b> TATGCC <b>AGATAGTAGCAACAAA</b>           | 15                  | 16, 38                | 3.7, 2.4           |                                                        |
| <i>rpoE</i> <sup>f</sup> | <b>TTAAC</b> TFACT <b>CGTCGCTTATCAAAA</b>             | 15                  | 65, 87                | 3.5, 3.8           |                                                        |
| <i>rpoH</i> <sup>f</sup> | <b>GGAAC</b> TTGGT <b>TTTTTTATTAGCTGTCAAAA</b>        | 17                  | -106, -82             | 5.2, 3.8           | -214, -189                                             |
| <i>rseC</i> <sup>f</sup> | <b>GCAAC</b> AGTT <b>GTGCAATATCAAAA</b>               | 10                  | 16, 33                | 3.3, 3.8           | 10, 33                                                 |

| Gene                     | Putative RpoE promoter <sup>a</sup>           | Spacer <sup>b</sup> | Position <sup>c</sup> | Score <sup>d</sup> | Position of additional putative promoters <sup>e</sup> |
|--------------------------|-----------------------------------------------|---------------------|-----------------------|--------------------|--------------------------------------------------------|
| <i>rsuA</i> <sup>f</sup> | <b>AGATTTT</b> GTGGTAAAGAAAGAG <b>CCTAAA</b>  | 15                  | -421, -399            | 2.5, 3.3           |                                                        |
| <i>sbcB</i>              | <b>TGAAC</b> TTATCAGATCACGTCAGT <b>CATA</b>   | 16                  | -260, -237            | 4.8, 3.1           |                                                        |
| <i>smpA</i> <sup>f</sup> | <b>TGAAC</b> TAAATGACACATTGACAAT <b>CAAA</b>  | 16                  | -141, -118            | 4.0, 3.8           | 46, 65                                                 |
| <i>surA</i> <sup>f</sup> | <b>TGAAC</b> CTTTTATAAAAATTTTACT <b>CTAA</b>  | 16                  | -71, -48              | 4.2, 3.7           | -70, -48                                               |
| <i>surE</i> <sup>f</sup> | <b>TGATTT</b> GTACAAC <b>TTGCCGATCAAA</b>     | 15                  | -359, -337            | 3.1, 3.8           |                                                        |
| <i>uppS</i> <sup>f</sup> | <b>GAAAC</b> TTCTGTGAATTTTGATCCT <b>TCAAA</b> | 17                  | 4, 28                 | 4.5, 3.8           | 3, 28                                                  |
| <i>uvrD</i> <sup>f</sup> | <b>TGAAT</b> GTAAATTTGAAAAAG <b>GATCAAA</b>   | 15                  | -363, -341            | 2.5, 3.8           |                                                        |
| <i>waaF</i> <sup>f</sup> | <b>ACAAC</b> TTAAACAGCAATAT <b>CCTAAA</b>     | 12                  | -76, -57              | 4.0, 3.3           | -79, -57                                               |

- 55 <sup>a</sup>Corresponds to putative RpoE promoter with the highest match score; putative -35 and -10 regions are highlighted in bold.
- 56 <sup>b</sup>Corresponds to putative RpoE promoter with the highest match score; spacer is the distance between putative -35 and -10 regions in the promoter.
- 57 <sup>c</sup>Corresponds to putative RpoE promoter with the highest match score; position of putative -35 and -10 regions in the promoter relative to TSS.
- 58 <sup>d</sup>Corresponds to putative RpoE promoter with the highest match score; match score is the sum of individual position scores from each letter in the sequence; and the
- 59 indicated match scores correspond to putative -35 and -10 regions in the promoter, respectively.
- 60 <sup>e</sup>Position of putative -35 and -10 regions of additional promoters identified in the upstream region relative to TSS.
- 61 <sup>f</sup>TUs that were enriched in whole genome enrichment analysis.

62

63

64
